# Supplementary material for: Investigation of the effect of thermal annealing of Ni-cobaltite nanoparticles on their structure, electronic properties and performance as catalysts for the total oxidation of dimethyl ether
Source: Royal Society of Chemistry journal article supplement (doi:10.1039/d3cy00807j), 2023-01-01
Supplement: d3cy00807j1.pdf [file d3cy00807j1.pdf]

## Electronic Supplementary Material

Investigation of the effect of thermal annealing of Ni-Cobaltite nanoparticles on their structure, electronic properties and performance as catalysts for the total oxidation of di(methyl)ether (DME).

Daniel Onana Mevoa<sup>a</sup>, Stephane Kenmoe<sup>b</sup>, Muhammad Waqas<sup>c</sup>, Dick Hartmann Douma<sup>d</sup>,  
Daniel Manhouli Daawe<sup>e</sup>, Katia Nchimi Nonof<sup>f</sup>, Ralph Gebauer<sup>g</sup> and Patrick Mountapmbeme  
Kouotou <sup>\*e,h</sup>

<sup>a</sup>Department of Chemistry, Faculty of Sciences, University of Maroua, P.O. Box 55, Cameroon.

<sup>b</sup>Department of Theoretical Chemistry, University of Duisburg-Essen, Universitätsstr. 2, D-45141 Essen, Germany

<sup>c</sup>Department of Mechanical Engineering, College of Engineering and Technology, University of Sargodha, Sargodha 40100, Pakistan.

<sup>d</sup>Groupe de Simulations Numériques en Magnétisme et Catalyse, Faculté des Sciences et Techniques, Université Marien Ngouabi, Brazzaville B.P. 69, Congo.

<sup>e</sup>National advanced school of engineering, University of Maroua, P.O. Box. 46, Maroua, Cameroon

<sup>f</sup>Institute für Anorganische Chemie Christian-Albrechts-Universität zu Kiel, Max-Eyth-Strasse 2, 24118 Kiel, Germany.

<sup>g</sup>The Abdus Salam International Centre for Theoretical Physics (ICTP), Strada Costiera 11, 34151 Trieste, Italy

<sup>h</sup>Higher Institute of Agriculture, Wood, Water and Environment, University of Ebolowa, P.O. Box 746 Ebolowa-Cameroon.

\*Corresponding authors: [mkpatrick1982@gmail.com](mailto:mkpatrick1982@gmail.com)

**Section 1 :** XPS details: Results of curve-fitting on the Co 2p, Ni 2p and O1s binding energies and relative atomic percentage for the five sets of catalysts.

**Table ESM1:** Results of curve-fitting on the Co 2p binding energies and relative atomic percentage for the five sets of catalysts.

| Catalysts                                          | Parameters | Co 2p3/2         |                  |                                        | Co 2p1/2         |                  |                                        |
|----------------------------------------------------|------------|------------------|------------------|----------------------------------------|------------------|------------------|----------------------------------------|
| Co <sub>3</sub> O <sub>4</sub>                     | Species    | Co <sup>2+</sup> | Co <sup>3+</sup> | <b>Co<sup>3+</sup>/Co<sup>2+</sup></b> | Co <sup>2+</sup> | Co <sup>3+</sup> | <b>Co<sup>3+</sup>/Co<sup>2+</sup></b> |
|                                                    | BE (eV)    | 779.35           | 780.86           | 4.32                                   | 795.18           | 797.14           | 4.12                                   |
|                                                    | RA (%)     | 18.81            | 81.19            |                                        | 19.54            | 80.46            |                                        |
| (NiCo <sub>2</sub> O <sub>4</sub> ) <sub>500</sub> | Species    | Co <sup>2+</sup> | Co <sup>3+</sup> | <b>Co<sup>3+</sup>/Co<sup>2+</sup></b> | Co <sup>2+</sup> | Co <sup>3+</sup> | <b>Co<sup>3+</sup>/Co<sup>2+</sup></b> |
|                                                    | BE (eV)    | 779.41           | 781.57           | 3.50                                   | 795.47           | 796.98           | 3.26                                   |
|                                                    | RA (%)     | 22.20            | 77.80            |                                        | 23.47            | 76.53            |                                        |
| (NiCo <sub>2</sub> O <sub>4</sub> ) <sub>450</sub> | Species    | Co <sup>2+</sup> | Co <sup>3+</sup> | <b>Co<sup>3+</sup>/Co<sup>2+</sup></b> | Co <sup>2+</sup> | Co <sup>3+</sup> | <b>Co<sup>3+</sup>/Co<sup>2+</sup></b> |
|                                                    | BE (eV)    | 779.27           | 780.98           | 2.91                                   | 795.66           | 797.41           | 2.68                                   |
|                                                    | RA (%)     | 25.57            | 74.43            |                                        | 27.18            | 72.82            |                                        |
| (NiCo <sub>2</sub> O <sub>4</sub> ) <sub>350</sub> | Species    | Co <sup>2+</sup> | Co <sup>3+</sup> | <b>Co<sup>3+</sup>/Co<sup>2+</sup></b> | Co <sup>2+</sup> | Co <sup>3+</sup> | <b>Co<sup>3+</sup>/Co<sup>2+</sup></b> |
|                                                    | BE (eV)    | 779.93           | 781.58           | 1.92                                   | 795.36           | 796.84           | 2.03                                   |
|                                                    | RA (%)     | 34.30            | 65.70            |                                        | 33.03            | 66.97            |                                        |
| Ni <sub>2</sub> O <sub>3</sub>                     | -          | -                | -                | -                                      | -                | -                | -                                      |

**Note:** BE refers to binding energy, and RA refers to the relative area of the peak.

**Table ESM2:** Results of curve-fitting on the Ni 2p binding energies and relative atomic percentage for the five sets of catalysts.

| Catalysts                                          | Parameters | Ni 2p3/2         |                  |                                        | Ni 2p1/2         |                  |                                        |
|----------------------------------------------------|------------|------------------|------------------|----------------------------------------|------------------|------------------|----------------------------------------|
| Co <sub>3</sub> O <sub>4</sub>                     | -          | -                | -                | -                                      | -                | -                | -                                      |
| (NiCo <sub>2</sub> O <sub>4</sub> ) <sub>500</sub> | Species    | Ni <sup>2+</sup> | Ni <sup>3+</sup> | <b>Ni<sup>3+</sup>/Ni<sup>2+</sup></b> | Ni <sup>2+</sup> | Ni <sup>3+</sup> | <b>Ni<sup>3+</sup>/Ni<sup>2+</sup></b> |
|                                                    | BE (eV)    | 854.20           | 855.84           | 3.13                                   | 871.57           | 873.20           | 3.67                                   |
|                                                    | RA (%)     | 24.20            | 75.80            |                                        | 21.42            | 78.58            |                                        |
| (NiCo <sub>2</sub> O <sub>4</sub> ) <sub>450</sub> | Species    | Ni <sup>2+</sup> | Ni <sup>3+</sup> | <b>Ni<sup>3+</sup>/Ni<sup>2+</sup></b> | Ni <sup>2+</sup> | Ni <sup>3+</sup> | <b>Ni<sup>3+</sup>/Ni<sup>2+</sup></b> |
|                                                    | BE (eV)    | 854.19           | 855.95           | 2.63                                   | 871.41           | 872.74           | 2.61                                   |
|                                                    | RA (%)     | 27.57            | 72.43            |                                        | 27.70            | 72.30            |                                        |
| (NiCo <sub>2</sub> O <sub>4</sub> ) <sub>350</sub> | Species    | Ni <sup>2+</sup> | Ni <sup>3+</sup> | <b>Ni<sup>3+</sup>/Ni<sup>2+</sup></b> | Ni <sup>2+</sup> | Ni <sup>3+</sup> | <b>Ni<sup>3+</sup>/Ni<sup>2+</sup></b> |
|                                                    | BE (eV)    | 854.18           | 855.85           | 2.06                                   | 871.37           | 872.76           | 2.23                                   |
|                                                    | RA (%)     | 32.72            | 67.28            |                                        | 30.98            | 69.02            |                                        |
| Ni <sub>2</sub> O <sub>3</sub>                     | Species    | Ni <sup>2+</sup> | Ni <sup>3+</sup> | <b>Ni<sup>3+</sup>/Ni<sup>2+</sup></b> | Ni <sup>2+</sup> | Ni <sup>3+</sup> | <b>Ni<sup>3+</sup>/Ni<sup>2+</sup></b> |
|                                                    | BE (eV)    | 854.42           | 856.27           | 1.19                                   | 871.65           | 873.25           | 1.07                                   |
|                                                    | RA (%)     | 45.60            | 54.40            |                                        | 48.36            | 51.64            |                                        |

**Note:** BE refers to binding energy, and RA refers to the relative area of the peak.

**Table ESM3:** Results of curve-fittings on the O1s binding energies and relative atomic percentage for the four sets of catalysts

| Catalysts                                          | Parameters | O 1s            |                               |                 |                                    |
|----------------------------------------------------|------------|-----------------|-------------------------------|-----------------|------------------------------------|
|                                                    |            | O <sup>2-</sup> | CO <sub>3</sub> <sup>2-</sup> | OH <sup>-</sup> | O <sub>Lat</sub> /O <sub>Ads</sub> |
| (NiCo <sub>2</sub> O <sub>4</sub> ) <sub>500</sub> | Species    | O <sup>2-</sup> | CO <sub>3</sub> <sup>2-</sup> | OH <sup>-</sup> | O <sub>Lat</sub> /O <sub>Ads</sub> |
|                                                    | BE (eV)    | 530.47          | 531.88                        | 532.96          | 1.68                               |
|                                                    | RA (%)     | 62.71           | 29.20                         | 8.09            |                                    |
| (NiCo <sub>2</sub> O <sub>4</sub> ) <sub>450</sub> | Species    | O <sup>2-</sup> | CO <sub>3</sub> <sup>2-</sup> | OH <sup>-</sup> | O <sub>Lat</sub> /O <sub>Ads</sub> |
|                                                    | BE (eV)    | 530.52          | 531.75                        | 532.70          | 1.47                               |
|                                                    | RA (%)     | 59.44           | 28.03                         | 12.53           |                                    |
| (NiCo <sub>2</sub> O <sub>4</sub> ) <sub>350</sub> | Species    | O <sup>2-</sup> | CO <sub>3</sub> <sup>2-</sup> | OH <sup>-</sup> | O <sub>Lat</sub> /O <sub>Ads</sub> |
|                                                    | BE (eV)    | 529.74          | 531.03                        | 532.09          | 1.32                               |
|                                                    | RA (%)     | 56.95           | 27.12                         | 15.93           |                                    |
| Co <sub>3</sub> O <sub>4</sub>                     | Species    | O <sup>2-</sup> | CO <sub>3</sub> <sup>2-</sup> | OH <sup>-</sup> | O <sub>Lat</sub> /O <sub>Ads</sub> |
|                                                    | BE (eV)    | 529.91          | 531.04                        | 532.02          | 1.18                               |
|                                                    | RA (%)     | 54.14           | 15.41                         | 30.45           |                                    |
| Ni <sub>2</sub> O <sub>3</sub>                     | Species    | O <sup>2-</sup> | CO <sub>3</sub> <sup>2-</sup> | OH <sup>-</sup> | O <sub>Lat</sub> /O <sub>Ads</sub> |
|                                                    | BE (eV)    | 530.03          | 531.16                        | 532.13          | 1.11                               |
|                                                    | RA (%)     | 52.71           | 12.85                         | 34.44           |                                    |

**Note:** BE refers to the binding energy; O<sub>Lat</sub> refers to the lattice oxygen; O<sub>Ads</sub> refers to the adsorption oxygen; RA refers to the relative area of the peak.

## Section 2: Catalytic performance comparison with the literature data.

**Table ESM4.** Comparison of the [NiCo<sub>2</sub>O<sub>4</sub>]<sub>500</sub> catalytic efficiency (T<sub>50</sub>, T<sub>90</sub>) to that of the single and mixed oxides reported catalysts from the literature.

| Material                                           | Weight (mg) | Gas composition                       | T <sub>50</sub> (°C) | T <sub>90</sub> (°C) | Refs. |
|----------------------------------------------------|-------------|---------------------------------------|----------------------|----------------------|-------|
| Singles oxides                                     |             |                                       |                      |                      |       |
| Co <sub>3</sub> O <sub>4</sub>                     | 60          | 5% DME/20% O <sub>2</sub> in Ar       | 300                  | 325                  | TW    |
| Fe <sub>3</sub> O <sub>4</sub>                     | 100         | 900 ppm DME /20% O <sub>2</sub> in He | 310                  | 345                  | [1]   |
| CuO                                                | 100         | 900 ppm DME /20% O <sub>2</sub> in He | 311                  | 358                  |       |
| α-MnO <sub>2</sub>                                 | 100         | 2% DME /20% O <sub>2</sub> in He      | 205                  | 238                  | [2]   |
| Mixed oxides                                       |             |                                       |                      |                      |       |
| [NiCo <sub>2</sub> O <sub>4</sub> ] <sub>500</sub> | 60          | 5% DME/20% O <sub>2</sub> in Ar       | 200                  | 240                  | TW    |
| Fe <sub>0.67</sub> Cu <sub>0.33</sub>              | 100         | 900 ppm DME /20% O <sub>2</sub> in He | 265                  | 292                  |       |
| Fe <sub>0.50</sub> Cu <sub>0.50</sub>              | 100         | 900 ppm DME /20% O <sub>2</sub> in He | 278                  | 313                  | [1]   |
| Fe <sub>0.33</sub> Cu <sub>0.67</sub>              | 100         | 900 ppm DME /20% O <sub>2</sub> in He | 287                  | 321                  |       |
| Co <sub>2.1</sub> Fe <sub>0.9</sub> O <sub>4</sub> | 20          | 1% DME/10% O <sub>2</sub> in Ar       | 356                  | 409                  | [3]   |

**Note:** TW stand for this work, T<sub>50</sub> and T<sub>90</sub> stand for temperature at 50 and 90% conversion of DME.

## References

1. Smyrnioti M., Ioannides T. Dimethyl Ether Oxidation over Copper Ferrite Catalysts . *Catalysts* 2022, 12, 604.
2. Cheng, G.; Yu, L.; He, B.; Sun, M.; Zhang, B.; Ye, W.; Lan, B. Catalytic Combustion of Dimethyl Ether over  $\alpha$ -MnO<sub>2</sub> Nanostructures with Different Morphologies. *Appl. Surf. Sci.* 2017, 409, 223–231.
3. Tian, Z.-Y.; Kouotou, P.M.; El Kasmi, A.; Tchoua Ngamou, P.H.; Kohse-Höinghaus, K.; Vieker, H.; Beyer, A.; Götzhäuser, A. Low-Temperature Deep Oxidation of Olefins and DME over Cobalt Ferrite. *Proc. Combust. Inst.* 2015, 35, 2207–2214.
